# Supplementary material
Source: publisher site journal article supplement (https://www.dovepress.com/article/246253)
Supplement: Supplementary file 1 [file get_supplementary_file.php]

**Supplemental Appendix**

| **Table S1** - Reliability statistics of the instrument used. | | | | | |
| --- | --- | --- | --- | --- | --- |
| Instrument sections | Number of items | Mean Score | SD | Cronbach α | Cronbach α based on standardized items |
| Message other professionals (Q9.1-Q9.8) | 8 | 42.6 | 109.859 | .917 | .886 |
| Interact through social media with professionals (Q9.9-Q9.19) | 11 | 55.04 | 162.974 | .963 | .940 |
| Academic research (Q9.20-Q9.30) | 11 | 61.71 | 169.641 | .962 | .926 |
| Message with patients (Q10.1-Q10.8) | 8 | 50.37 | 156.878 | .980 | .970 |
| Interact through social media with patients (Q10.9-Q10.19) | 11 | 61.13 | 219.079 | 1.000 | 1.000 |
| Perceptions (Q11.1-Q11.7) | 7 | 23.62 | 6.726 | .807 | .797 |
| Barriers (Q12.1-Q12.4) | 4 | 10.65 | 4.029 | .709 | .717 |
| Notes: All data are presented as reliability coefficients. SD, standard deviation | | | | | |

| **Table S2** – Frequencies of use of ICTs for professional and patient related purposes by age and gender. | | | | | | | | |
| --- | --- | --- | --- | --- | --- | --- | --- | --- |
|  | Age | | Chi-Square p value | Total | Gender | | Chi-Square p value | Total |
| < 40 years old (n=350) | ≥ 40 years old (n=289) | Male (n=339) | Female (n=292) |
| ***Frequencies of use of ICTs for professional purpose*** | | | | | | | | |
| Message other professionals | 348 (99.4) | 289 (100) | .504a | 637 (99.7) | 338 (99.7) | 291 (99.7) | 1.000a | 629 (99.7) |
| Interact through social media with professionals | 321 (91.7) | 251 (86.9) | .046 | 572 (89.5) | 297 (87.6) | 267 (91.4) | .120 | 564 (89.4) |
| Academic research | 350 (100) | 287 (99.3) | .204a | 637 (99.7) | 338 (99.7) | 291 (99.7) | 1.000a | 629 (99.7) |
| ***Frequencies of use of ICTs for patient communication*** | | | | | | | | |
| Message with patients | 317 (90.6) | 278 (96.2) | .007a | 595 (93.1) | 316 (93.2) | 272 (93.2) | .974 | 588 (93.2) |
| Interact through social media with patients | 206 (58.9) | 166 (57.4) | .747 | 372 (58.2) | 200 (59.0) | 167 (57.2) | .647 | 367 (58.2) |
| Notes: All data are presented as percentages. Differences in values between the two age and gender groups are significant at .05 significance level a. Fisher exact test performed. | | | | | | | | |

| **Table S3** – Frequencies of use of ICTs for professional and patient related purposes by postgraduate years and type of physician. | | | | | | | | |
| --- | --- | --- | --- | --- | --- | --- | --- | --- |
|  | Postgraduate years | | Chi-Square p value | Total | Physician type | | Chi-Square p value | Total |
| < 15 years (n=331) | ≥ 15 years (n=281) | Non-specialist (n=383) | Specialist (n=253) |
| ***Frequencies of use of ICTs for professional purpose*** | | | | | | | | |
| Message other professionals | 329 (99.4) | 281 (100) | .503a | 610 (99.7) | 382 (99.7) | 252 (99.6) | 1.000a | 634 (99.7) |
| Interact through social media with professionals | 304 (91.8) | 243 (86.5) | .032 | 547 (89.4) | 354 (92.4) | 216 (85.4) | .004 | 570 (89.6) |
| Academic research | 331 (100) | 280 (99.6) | .459a | 611 (99.8) | 381 (99.5) | 253 (100) | .520a | 634 (99.7) |
| ***Frequencies of use of ICTs for patient communication*** | | | | | | | | |
| Message with patients | 297 (89.7) | 275 (97.9) | .000 | 572 (93.5) | 353 (92.2) | 239 (94.5) | .263 | 592 (93.1) |
| Interact through social media with patients | 181 (56.5) | 168 (59.8) | .411 | 355 (58.0) | 238 (62.1) | 133 (52.6) | .017 | 371 (58.3) |
| Notes: All data are presented as percentages. Differences in values between the two "postgraduate years" and "physician type" groups are significant at .05 significance level a. Fisher exact test performed. | | | | | | | | |

| **Table S4** – Usefulness/Perceptions of ICTs among physicians by age and gender. | | | | | | | | |
| --- | --- | --- | --- | --- | --- | --- | --- | --- |
|  | Age | | Chi-Square p value | Total | Gender | | Chi-Square p value | Total |
| < 40 years old (n=350) | ≥ 40 years old (n=289) | Male (n=339) | Female (n=292) |
| Promotion of medical services | 309 (89.3) | 222 (78.2) | .000 | 531 (84.3) | 292 (87.4) | 232 (80.6) | .019 | 524 (84.2) |
| Searching new job opportunities | 299 (86.4) | 227 (80.5) | .045 | 526 (83.8) | 280 (83.6) | 240 (84.2) | .832 | 520 (83.9) |
| Getting involved in research projects | 308 (88.5) | 236 (82.8) | .040 | 544 (85.9) | 288 (85.5) | 250 (86.8) | .628 | 538 (86.1) |
| Health promotion | 312 (90.2) | 237 (84.0) | .021 | 549 (87.4) | 288 (86.7) | 254 (88.2) | .588 | 542 (87.4) |
| Working with colleagues | 296 (86.3) | 247 (87.0) | .805 | 543 (86.6) | 291 (87.7) | 246 (85.7) | .479 | 537 (86.8) |
| Reserved to interact with colleagues through ICTs | 97 (28.1) | 106 (37.6) | .012 | 203 (32.4) | 116 (34.9) | 85 (29.6) | .158 | 201 (32.5) |
| Prefer traditional channels of communication | 127 (38.0) | 139 (50.2) | .003 | 266 (43.5) | 138 (42.7) | 125 (44.5) | .664 | 263 (43.5) |
| Notes: All data are presented as percentages. Differences in values between the two age and gender groups are significant at .05 significance level | | | | | | | | |

| **Table S5** – Usefulness/Perceptions of ICTs among physicians by postgraduate years and physician type. | | | | | | | | |
| --- | --- | --- | --- | --- | --- | --- | --- | --- |
|  | Postgraduate years | | Chi-Square p value | Total | Physician type | | Chi-Square p value | Total |
| < 15 years (n=331) | ≥ 15 years (n=281) | Non-specialist (n=383) | Specialist (n=253) |
| Promotion of medical services | 294 (90.2) | 214 (77.3) | .000 | 508 (84.2) | 326 (86.2) | 203 (81.5) | .111 | 529 (84.4) |
| Searching new job opportunities | 282 (86.8) | 221 (80.1) | .027 | 503 (83.7) | 329 (88.0) | 194 (77.3) | .000 | 523 (83.7) |
| Getting involved in research projects | 293 (89.6) | 229 (82.1) | .008 | 522 (86.1) | 341 (90.2) | 200 (79.4) | .000 | 541 (85.9) |
| Health promotion | 296 (90.5) | 229 (83.6) | .011 | 525 (87.4) | 346 (91.8) | 200 (80.6) | .000 | 546 (87.4) |
| Working with colleagues | 280 (86.7) | 239 (86.3) | .885 | 519 (86.5) | 337 (90.1) | 203 (81.2) | .001 | 540 (86.5) |
| Reserved to interact with colleagues through ICTs | 84 (25.7) | 111 (40.7) | .000 | 195 (32.5) | 111 (29.5) | 89 (35.7) | .103 | 200 (32.0) |
| Prefer traditional channels of communication | 122 (38.4) | 135 (50.4) | .004 | 257 (43.9) | 147 (40.3) | 118 (48.6) | .044 | 265 (43.6) |
| Notes: All data are presented as percentages. Differences in values between the two "postgraduate years" and "physician type" groups are significant at .05 significance level | | | | | | | | |

| **Table S6** – Barriers for ICTs use among by physicians by age and gender. | | | | | | | | |
| --- | --- | --- | --- | --- | --- | --- | --- | --- |
|  | Age | | Chi-Square p value | Total | Gender | | Chi-Square p value | Total |
| < 40 years old (n=350) | ≥ 40 years old (n=289) | Male (n=339) | Female (n=292) |
| Concerns about privacy and patient confidentiality | 290 (83.6) | 235 (83.6) | .985 | 525 (83.6) | 288 (86.2) | 231 (80.8) | .067 | 519 (83.7) |
| Limited mobile internet access | 72 (21.7) | 69 (25.7) | .213 | 141 (23.3) | 79 (24.8) | 63 (22.7) | .563 | 142 (23.8) |
| Limited internet access at work facilities | 111 (33.3) | 88 (32.2) | .774 | 199 (32.8) | 104 (32.4) | 93 (33.6) | .760 | 197 (32.9) |
| Lack of time | 175 (52.2) | 152 (55.9) | .371 | 327 (53.9) | 184 (57.7) | 140 (50.0) | .060 | 324 (54.1) |
| Notes: All data are presented as percentages. Differences in values between the two age and gender groups are significant at .05 significance level | | | | | | | | |

| **Table S7** – Barriers for ICTs use among by physicians by postgraduate years and physician type. | | | | | | | | |
| --- | --- | --- | --- | --- | --- | --- | --- | --- |
|  | Postgraduate years | | Chi-Square p value | Total | Physician type | | Chi-Square p value | Total |
| < 15 years (n=331) | ≥ 15 years (n=281) | Non-specialist (n=383) | Specialist (n=253) |
| Concerns about privacy and patient confidentiality | 281 (85.4) | 226 (83.1) | .435 | 507 (84.4) | 319 (84.6) | 203 (81.9) | .363 | 522 (83.5) |
| Limited mobile internet access | 60 (19.1) | 74 (28.1) | .011 | 134 (23.2) | 84 (23.4) | 57 (23.5) | .987 | 141 (23.4) |
| Limited internet access at work facilities | 106 (33.5) | 83 (31.4) | .590 | 189 (32.6) | 125 (34.2) | 74 (31.0) | .401 | 199 (32.9) |
| Lack of time | 171 (53.8) | 145 (55.3) | .706 | 316 (54.5) | 188 (51.5) | 137 (57.3) | .161 | 325 (53.8) |
| Notes: All data are presented as percentages. Differences in values between the two "postgraduate years" and "physician type" groups are significant at .05 significance level | | | | | | | | |
